# Supplementary material for: A WORLDWIDE ENIGMA STUDY ON EPILEPSY-RELATED GRAY AND WHITE MATTER COMPROMISE ACROSS THE ADULT LIFESPAN
Source: PubMed Central journal article supplement — bioRxiv. 2024 Mar 6:2024.03.02.583073. Preprint. [Version 1] doi: 10.1101/2024.03.02.583073 (PMC10942350; doi:10.1101/2024.03.02.583073), 2024-03-06

## SUPPLEMENTARY

**Table S1 | Detailed clinico-demographic data of ENIGMA-Epilepsy TLE cohort**

| <b>Case-control cohort</b>              | <b>Age (years)</b> | <b>Sex (F/M)</b> | <b>Age of onset (years)</b> | <b>Disease duration (years)</b> | <b>Engel score (I)</b> |
|-----------------------------------------|--------------------|------------------|-----------------------------|---------------------------------|------------------------|
| HC<br>( <i>n</i> = 886)                 | 36.0 ± 11.7        | 508/378          | –                           | –                               | –                      |
| L TLE MTS<br>( <i>n</i> =280)           | 39.0 ± 10.8        | 161/119          | 14.9 ± 11.8*                | 23.8 ± 13.5*                    | 102                    |
| R TLE MTS<br>( <i>n</i> =226)           | 39.8 ± 10.9        | 130/96           | 15.1 ± 11.3*                | 24.4 ± 13.8*                    | 66                     |
| L TLE non-lesional<br>( <i>n</i> = 150) | 36.0 ± 10.5        | 93/133           | 19.4 ± 11.4*                | 16.8 ± 12.0*                    | 23                     |
| R TLE non-lesional<br>( <i>n</i> =113)  | 36.5 ± 11.5        | 71/42            | 19.9 ± 13.4*                | 14.8 ± 10.9*                    | 25                     |

Age, age of onset, and disease duration are presented in mean ± SD. \*Clinical information available: a) age of onset: L-TLE MTS = 8/280, R-TLE MTS = 11/130, L-TLE non-lesional = 8/150, R-TLE non-lesional 7/113; b) disease duration: L-TLE MTS = 32/280, R-TLE MTS = 24/130, L-TLE non-lesional 16/150, R-TLE non-lesional 18/113.

**TABLE S2 | White matter tract labels**

| Group                | Tract abbreviation | Full name                                    |
|----------------------|--------------------|----------------------------------------------|
| Corpus Callosum      | SCC                | Splenium of the corpus callosum              |
|                      | BCC                | Body of the corpus callosum                  |
|                      | GCC                | Genu of the corpus callosum                  |
| Limbic               | FX                 | Fornix (column and body)                     |
|                      | FXST               | Fornix (cres) / Stria terminalis             |
|                      | CGH                | Cingulum (hippocampus)                       |
|                      | CCG                | Cingulum (cingulate gyrus)                   |
|                      | UNC                | Uncinate fasciculus                          |
| Cortical-subcortical | ALIC               | Anterior limb of the internal capsule        |
|                      | PLIC               | Posterior limb of the internal capsule       |
|                      | RLIC               | Retrolenticular part of the internal capsule |
|                      | ACR                | Anterior corona radiata                      |
|                      | SCR                | Superior corona radiata                      |
|                      | PCR                | Posterior corona radiata                     |
|                      | PTR                | Posterior thalamic radiation                 |
|                      | EC                 | External capsule                             |
|                      | CST                | Corticospinal tract                          |
| Cortical             | SS                 | Sagittal stratum                             |
|                      | SLF                | Superior longitudinal fasciculus             |
|                      | SFO                | Superior fronto-occipital fasciculus         |
|                      | IFO                | Inferior fronto-occipital fasciculus         |

**FIGURE S3 | Sensitivity analyses with age-sliding window ranges**

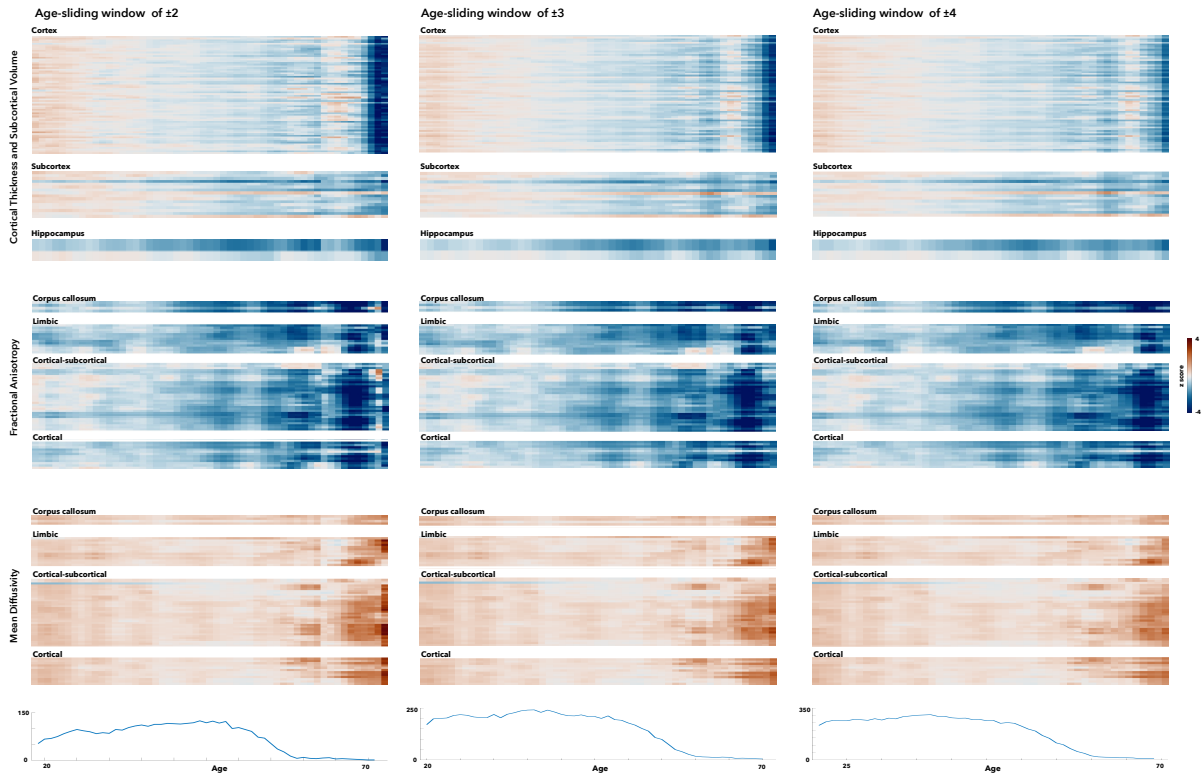

FIGURE S4 | Covariance of lifespan trajectories separated by ipsilateral and contralateral structures and regions

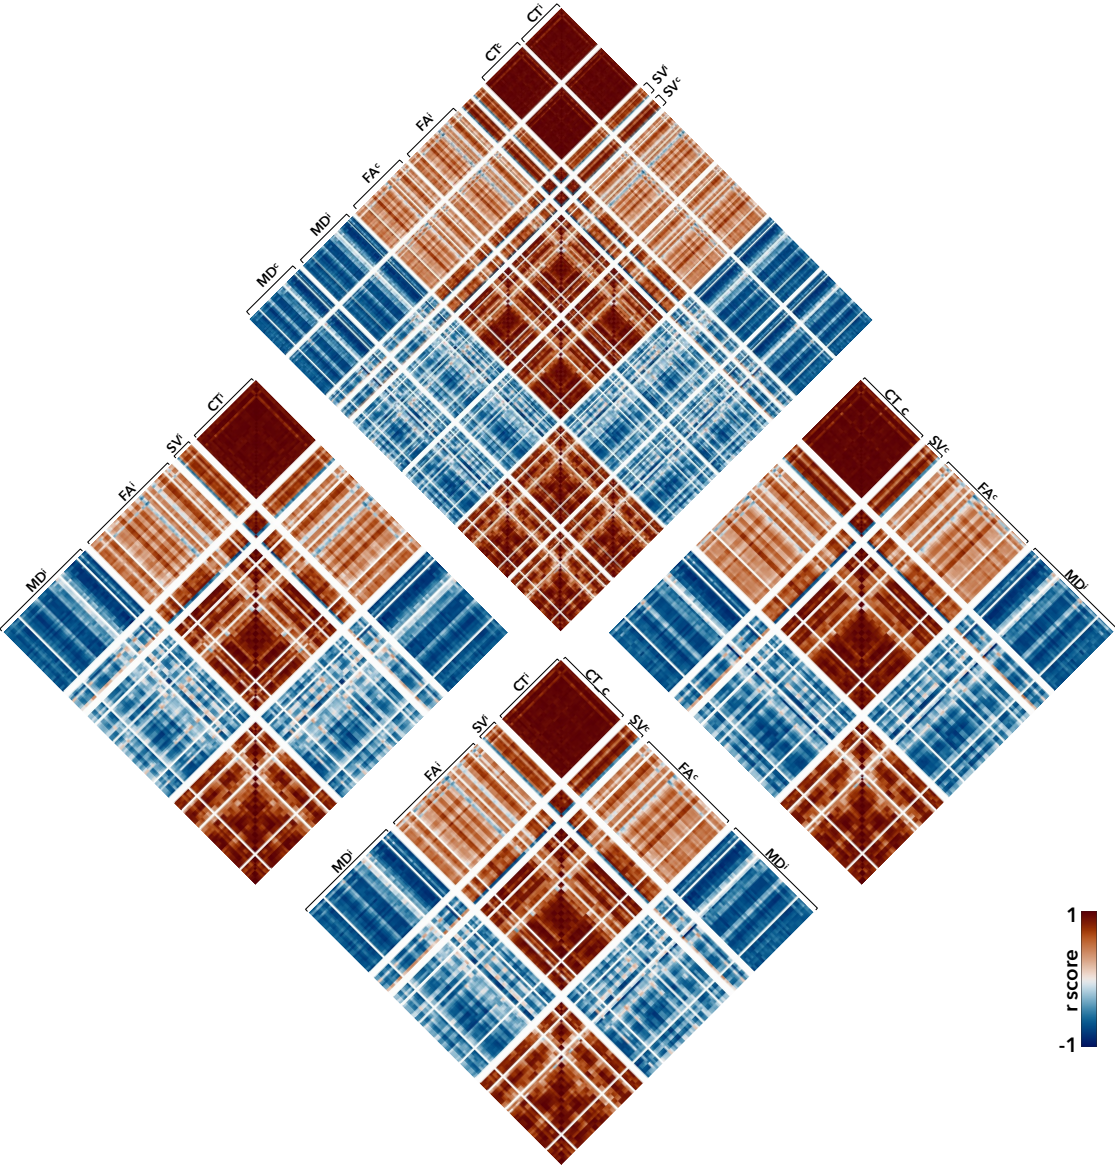

Supplement: media-1.pdf [file media-1.pdf]
